# Supplementary material for: Floral Color Properties of Serpentine Seep Assemblages Depend on Community Size and Species Richness
Source: Front Plant Sci. 2021 Jan 8;11:602951. doi: 10.3389/fpls.2020.602951 (PMC7820368; doi:10.3389/fpls.2020.602951)
Supplement: Supplementary Table 1 — List of 55 plant species used in study, along with community membership and flower visitor information. Seep sites are ordered by increasing species richness. An X in the “F” Visit column denotes that a focal plant species is visited by fly species, an X in the “B” Visit column denotes that a focal plant species is visited by bee species. [file Data_Sheet_1.XLSX]

## Sheet: TableS1_species
Supplemental Table S1. List of 55 plant species used in study, along with community membership and pollinator visitation information. Seep sites are ordered by increasing species richness. An X in the “F” Visit column denotes that a focal plant species is visited by fly species, an X in the “B” Visit column denotes that a focal plant species is visited by bee species.
PLANT SPECIES INFORMATION
	Known visitors		Seep Sites
Plant Species Name	Fly	Bee	SPCL	SPCU	CS	HS	LM	KC	RH2	RH1	RHA	TPW	CL	PP	RHB	BS
Acmispon americanus				X			X		X	X	X			X	X	X
Acmispon brachycarpus		X
Acmispon parviflorus		X
Allium amplectens	X	X
Anagallis arvensis	X	X					X					X
Angelica tomentosa	X							X
Antirrhinum cornutum		X			X	X			X	X	X		X	X	X	X
Aquilegia eximia								X						X		X
Astragalus clevelandii	X	X					X	X				X		X		X
Brodiaea elegans	X	X							X	X
Calochortus amabilis	X	X
Calycanthus occidentalis
Calystegia purpurata
Castilleja foliolosa				X		X				X	X	X	X			X
Castilleja rubicundula	X	X					X								X
Centaurea solstitialis		X					X	X						X
Clarkia gracilis		X				X			X	X	X		X		X	X
Collinsia sparsiflora		X
Delphinium uliginosum	X	X			X	X	X		X	X		X			X	X
Epipactis gigantea	X
Eriophyllum lanatum	X	X									X				X	X
Eschscholzia californica		X							X	X
Grindelia hirsutula	X	X							X			X
Helenium bigelovii		X	X					X
Helianthus exilis		X			X	X	X		X	X	X	X	X	X	X	X
Hemizonia congesta	X					X			X			X			X
Hesperolinon californicum										X
Hesperolinon disjunctum	X	X
Heterocodon rariflorum		X
Hoita macrostachya								X					X	X
Horkelia californica		X											X
Lagophylla minor		X													X
Lessingia micradenia		X				X				X	X	X		X	X	X
Mimulus guttatus	X	X			X	X	X	X	X	X	X	X	X	X	X	X
Mimulus layneae	X	X									X				X
Mimulus nudatus	X	X									X		X	X	X	X
Monardella viridis
Packera clevelandii		X	X	X				X			X		X	X		X
Penstemon heterophyllus								X
Plagiobothrys stipitatus	X	X		X									X	X	X	X
Ranunculus californicus	X	X
Rhododendron occidentale		X
Sambucus mexicana		X
Scutellaria siphocampyloides	X	X							X			X	X	X	X	X
Sidalcea diploscypha		X										X
Sisyrinchium bellum		X
Solidago californica	X	X					X						X			X
Stachys albens		X		X				X				X	X	X
Streptanthus brachiatus		X	X							X	X
Thermopsis macrophylla													X
Toxicoscordion venenosum	X	X			X			X	X	X	X	X		X	X	X
Trichostema laxum		X	X	X	X	X	X	X	X	X	X	X	X	X		X
Trifolium obtusiflorum	X	X						X							X
Triteleia peduncularis	X	X	X		X	X		X	X	X	X	X	X	X	X	X
Zeltnera trichantha	X	X	X	X	X	X	X	X	X	X	X	X	X	X	X	X

## Sheet: Table_S2_Correlations
Supplemental Table S2. Correlation Panel for Species Richness, Seep Area, and Plant Density.
Correlation	Sp	Area	Plant Density
Sp		0.78 (p=0.0011)	0.7 (p=0.0051)
Area	0.78 (p=0.0011)		0.4 (p=0.1531)
WPD	0.7 (p=0.0051)	0.4 (p=0.1531)

## Sheet: Table_S3_Loadings
Supplemental Table S3. Principal Component Loadings for Species Richness, Seep Area, and Plant Density.
Seep	Sp. Richness	Area (m^2)	WPD (proportion)	Prin1	Prin2	Prin3
SPCL	6	103	0.29125	-2.98195	-1.26371	-0.114632
SPCU	7	61.2	0.647	-1.78204	0.615792	0.463442
CS	8	43.9666	0.5	-2.20403	-0.0344547	-0.123452
HS	11	164.7	0.63875	-0.888575	0.099634	0.106801
LM	11	201.55	0.71125	-0.511614	0.296972	0.40508
KC	15	381.51	0.7245	0.725753	-0.432362	0.348262
RH2	15	118.745	0.8996	0.390224	1.50266	-0.0659255
RH1	16	131.32	0.8806	0.508909	1.34697	-0.239901
RHA	16	176	0.6578	-0.0901614	0.0857759	-0.647175
TPW	16	382.755	0.8175	1.18501	-0.000207551	0.414921
CL	18	421.74	0.76	1.4051	-0.463122	0.0633351
PP	18	393.68	0.67875	1.02953	-0.739159	-0.228247
RHB	19	295.68	0.7073	0.918185	-0.206776	-0.641196
BS	20	551.65	0.805	2.29566	-0.808018	0.258687

## Sheet: Table_S4_Spectrometry Data
Supplemental Table S4. Details of spectra collection parameters for each plant species.
Plant species	Boxcar smoothing width	Integration time (µseconds)	Spectra averaged	Spectrometer(s) (no. of measurements)
Acmispon americanus	3	50000	30	Ocean Optics JAZA2421 (10)
Acmispon brachycarpus	10	100000	20	Ocean Optics USB2+R00241 (5)
Acmispon parviflorus	25	250000	10	Ocean Optics USB4H06486 (4)
Allium amplectens	25	250000	10	Ocean Optics USB4H06486 (3)
Anagallis arvensis	3 - 25	50000 - 250000	10 - 30	Ocean Optics JAZA2421 (3); Ocean Optics USB4H06486 (3)
Angelica tomentosa	25	250000	10	Ocean Optics USB4H06486 (5)
Antirrhinum cornutum	25	250000	10	Ocean Optics USB4H06486 (3)
Aquilegia eximia	3 - 25	50000 - 250000	10 - 30	Ocean Optics JAZA2421 (20); Ocean Optics USB4H06486 (8)
Astragalus clevelandii	10 - 25	50000 - 250000	10 - 30	Ocean Optics JAZA2421 (5); Ocean Optics USB4H06486 (5)
Brodiaea elegans	3 - 25	50000 - 250000	10 - 30	Ocean Optics JAZA2421 (5); Ocean Optics USB4H06486 (4)
Calochortus amabilis	10	100000	20	Ocean Optics USB2+R00241 (10)
Calycanthus occidentalis	3	50000	30	Ocean Optics JAZA2421 (5)
Calystegia purpurata	3	50000	30	Ocean Optics JAZA2421 (10)
Castilleja foliolosa	3 - 25	50000 - 250000	10 - 30	Ocean Optics JAZA2421 (7); Ocean Optics USB4H06486 (3)
Castilleja rubicundula	3 - 25	50000 - 250000	10 - 30	Ocean Optics JAZA2421 (5); Ocean Optics USB4H06486 (5)
Centaurea solstitialis	3	50000	30	Ocean Optics JAZA2421 (5)
Clarkia gracilis	3 - 25	50000 - 250000	10 - 30	Ocean Optics JAZA2421 (15); Ocean Optics USB4H06486 (13)
Collinsia sparsiflora	10	25000	25	Ocean Optics USB2+R00241 (2)
Delphinium uliginosum	3 - 25	50000 - 250000	10 - 30	Ocean Optics JAZA2421 (2); Ocean Optics USB4H06486 (15)
Epipactis gigantea	10	100000	20	Ocean Optics USB2+R00241 (15)
Eriophyllum lanatum	3 - 25	50000 - 250000	10 - 30	Ocean Optics JAZA2421 (10); Ocean Optics USB4H06486 (4)
Eschscholzia californica	3	50000	30	Ocean Optics JAZA2421 (10)
FOLIAGE (Acmispon americanus)	3	50000	30	Ocean Optics JAZA2421 (1)
FOLIAGE (Acmispon brachycarpus)	10	100000	20	Ocean Optics USB2+R00241 (1)
FOLIAGE (Castilleja foliolosa)	3	50000	30	Ocean Optics JAZA2421 (2)
FOLIAGE (Calochortus amabilis)	10	100000	20	Ocean Optics USB2+R00241 (1)
FOLIAGE (Grindelia hirsutula)	3	50000	30	Ocean Optics JAZA2421 (1)
Grindelia hirsutula	3 - 25	50000 - 250000	10 - 30	Ocean Optics JAZA2421 (5); Ocean Optics USB4H06486 (3)
Helenium bigelovii	10	50000	30	Ocean Optics JAZA2421 (10)
Helianthus exilis	3 - 25	50000 - 250000	10 - 30	Ocean Optics JAZA2421 (10); Ocean Optics USB4H06486 (1)
Hemizonia congesta	3 - 25	50000 - 250000	10 - 30	Ocean Optics JAZA2421 (5); Ocean Optics USB4H06486 (6)
Hesperolinon californicum	3	50000	30	Ocean Optics JAZA2421 (5)
Hesperolinon disjunctum	25	250000	10	Ocean Optics USB4H06486 (2)
Heterocodon rariflorum	10	25000	25	Ocean Optics USB2+R00241 (1)
Hoita macrostachya	3	50000	30	Ocean Optics JAZA2421 (5)
Horkelia californica	25	250000	10	Ocean Optics USB4H06486 (5)
Lagophylla minor	25	250000	10	Ocean Optics USB4H06486 (1)
Lessingia micradenia	3 - 25	50000 - 250000	10 - 30	Ocean Optics JAZA2421 (5); Ocean Optics USB4H06486 (7)
Mimulus guttatus	25	250000	10	Ocean Optics USB4H06486 (20)
Mimulus layneae	10	50000	50	Ocean Optics USB2+R00241 (8)
Mimulus nudatus	10 - 25	50000 - 250000	10 - 30	Ocean Optics JAZA2421 (3); Ocean Optics USB4H06486 (7)
Monardella viridis	3	50000	30	Ocean Optics JAZA2421 (5)
Packera clevelandii	3	50000	30	Ocean Optics JAZA2421 (5)
Penstemon heterophyllus	3	50000	30	Ocean Optics JAZA2421 (10)
Plagiobothrys stipitatus	25	250000	10	Ocean Optics USB4H06486 (4)
Ranunculus californicus	25	250000	10	Ocean Optics USB4H06486 (10)
Rhododendron occidentale	3	50000	30	Ocean Optics JAZA2421 (10)
Sambucus mexicana	10	100000	20	Ocean Optics USB2+R00241 (19)
Scutellaria siphocampyloides	3 - 25	50000 - 250000	10 - 30	Ocean Optics JAZA2421 (5); Ocean Optics USB4H06486 (5)
Sidalcea diploscypha	3 - 25	50000 - 250000	10 - 30	Ocean Optics JAZA2421 (10); Ocean Optics USB4H06486 (2)
Sisyrinchium bellum	25	250000	10	Ocean Optics USB4H06486 (1)
Solidago californica	3	50000	30	Ocean Optics JAZA2421 (5)
Stachys albens	3 - 25	50000 - 250000	10 - 30	Ocean Optics JAZA2421 (5); Ocean Optics USB4H06486 (8)
Streptanthus brachiatus	3 - 25	50000 - 250000	10 - 30	Ocean Optics JAZA2421 (5); Ocean Optics USB4H06486 (4)
Thermopsis macrophylla	10	100000	20	Ocean Optics USB2+R00241 (20)
Toxicoscordion venenosum	25	250000	10	Ocean Optics USB4H06486 (5)
Trichostema laxum	3 - 25	50000 - 250000	10 - 30	Ocean Optics JAZA2421 (5); Ocean Optics USB4H06486 (4)
Trifolium obtusiflorum	3 - 25	50000 - 250000	10 - 30	Ocean Optics JAZA2421 (5); Ocean Optics USB4H06486 (4)
Triteleia peduncularis	10 - 25	50000 - 250000	10 - 30	Ocean Optics JAZA2421 (5); Ocean Optics USB4H06486 (5)
Zeltnera trichantha	3 - 25	50000 - 250000	10 - 30	Ocean Optics JAZA2421 (10); Ocean Optics USB4H06486 (4)

## Sheet: Table_S5Internal Contrast Notes
Supplemental Table S5. Descriptions of noted color differences within the flowering unit of each plant species in the study.
Plant species	Internal contrast estimated	Details of measured internal contrast
Acmispon americanus	yes	Upper petal & smaller lower petal
Acmispon brachycarpus	no
Acmispon parviflorus	no
Allium amplectens	no
Anagallis arvensis	no
Angelica tomentosa	no
Antirrhinum cornutum	no
Aquilegia eximia	yes	Outer petal area, inner petal area, bract, spur
Astragalus clevelandii	no
Brodiaea elegans	no
Calochortus amabilis	yes	petal, sepal
Calycanthus occidentalis	no
Calystegia purpurata	yes	petal, petal stripe
Castilleja foliolosa	yes	upper leaf tips, lower leaf
Castilleja rubicundula	no
Centaurea solstitialis	no
Clarkia gracilis	yes	dark pink base, middle white section, upper pink apex
Collinsia sparsiflora	yes	upper light purple petals, lower dark purple petals
Delphinium uliginosum	yes	middle white petal base, petal apex
Epipactis gigantea	yes	Sepals, top petal, lowest petal
Eriophyllum lanatum	yes	Ray and disc petals
Eschscholzia californica	yes	inner petal area, outer petal area
FOLIAGE (Acmispon americanus)	no
FOLIAGE (Acmispon brachycarpus)	no
FOLIAGE (Castilleja foliolosa)	no	only lower section of leaves (not upper red tips)
FOLIAGE (Calochortus amabilis)	no
FOLIAGE (Grindelia hirsutula)	no
Grindelia hirsutula	yes	Ray and disc petals
Helenium bigelovii	yes	Ray and disc petals
Helianthus exilis	yes	Ray and disc petals
Hemizonia congesta	no
Hesperolinon californicum	no
Hesperolinon disjunctum	no
Heterocodon rariflorum	no
Hoita macrostachya	no
Horkelia californica	no
Lagophylla minor	no
Lessingia micradenia	yes	Ray and disc petals
Mimulus guttatus	yes	Upper petal, freckled base of middle lower petal, left lower petal apex
Mimulus layneae	yes	lower pink petal, lower white petal area, dark pink inner petal area,
Mimulus nudatus	yes	middle bottom lobe base, upper petal area
Monardella viridis	no
Packera clevelandii	no
Penstemon heterophyllus	yes	petal base, corolla base
Plagiobothrys stipitatus	no
Ranunculus californicus	yes	Petal apex, petal base
Rhododendron occidentale	yes	middle upper yellow petal area, white petal area
Sambucus mexicana	no
Scutellaria siphocampyloides	no
Sidalcea diploscypha	yes	Petal apex, petal base
Sisyrinchium bellum	no
Solidago californica	no
Stachys albens	yes	upper petals, lower petals
Streptanthus brachiatus	no
Thermopsis macrophylla	no
Toxicoscordion venenosum	no
Trichostema laxum	no
Trifolium obtusiflorum	no
Triteleia peduncularis	no
Zeltnera trichantha	yes	Petal apex, petal base

## Sheet: TableS6_z-scores_Bee_all
Seep Name	Species Richness	Observed Mean	Null Mean ± s.d.	Observed z-score	p-value
PCL	6	11.833	8.674 ± 2.124	3.643	0.0003***
PCU	7	9.273	8.677 ± 2.027	0.778	0.4365
CS	8	10.624	8.661 ± 1.935	2.869	0.0041**
HS	11	8.727	8.657 ± 1.818	0.127	0.899
LM	11	10.053	8.656 ± 1.745	2.656	0.0079**
KC	15	9.889	8.656 ± 1.658	2.879	0.0040**
RH2	15	9.669	8.657 ± 1.592	2.462	0.0138*
RH1	16	8.511	8.658 ± 1.534	-0.382	0.7026
RHA	16	10.187	8.656 ± 1.491	4.106	<.0001***
TPW	16	9.161	8.657 ± 1.454	1.386	0.1658
CL	18	9.937	8.658 ± 1.418	3.826	0.0001***
PP	18	9.374	8.659 ± 1.387	2.189	0.0286*
RHB	19	8.748	8.658 ± 1.357	0.288	0.7736
BS	20	9.786	8.658 ± 1.330	3.792	0.0001***

## Sheet: TableS7_z-scores_Fly_all
Seep Name	Species Richness	Observed Mean	Null Mean ± s.d.	Observed z-score	p-value
PCL	6	29.312	22.982 ± 4.647	3.337	0.0008***
PCU	7	25.875	23.004 ± 4.391	1.73	0.0837
CS	8	28.66	23.036 ± 4.190	3.796	0.0001***
HS	11	23.204	23.027 ± 3.934	0.149	0.8816
LM	11	25.4	23.032 ± 3.769	2.083	0.0372*
KC	15	27.54	23.035 ± 3.577	4.877	<.0001***
RH2	15	25.72	23.031 ± 3.437	3.03	0.0024**
RH1	16	22.728	23.033 ± 3.318	-0.368	0.7126
RHA	16	25.274	23.034 ± 3.223	2.779	0.0055**
TPW	16	26.396	23.036 ± 3.143	4.277	<.0001***
CL	18	25.02	23.033 ± 3.063	2.752	0.0059**
PP	18	25.577	23.030 ± 2.994	3.609	0.0003***
RHB	19	23.553	23.034 ± 2.931	0.771	0.4407
BS	20	25.225	23.037 ± 2.871	3.409	0.0007***

## Sheet: TableS8_z-scores_Bee_visit
Seep Name	Species Richness*	Observed Mean	Null Mean ± s.d.	Observed z-score	p-value
PCL	6	11.833	8.969 ± 2.195	3.196	0.0014***
PCU	5	11.115	8.955 ± 2.344	2.061	0.0393*
CS	8	10.624	8.968 ± 2.030	2.308	0.0210**
HS	9	9.155	8.970 ± 1.920	0.289	0.773
LM	10	10.457	8.971 ± 1.831	2.565	0.0103*
KC	11	10.544	8.971 ± 1.756	2.971	0.0030**
RH2	13	10.292	8.971 ± 1.684	2.829	0.0047**
RH1	13	9.439	8.970 ± 1.629	1.038	0.2991
RHA	14	10.888	8.969 ± 1.579	4.548	<.0001***
TPW	14	9.625	8.969 ± 1.537	1.597	0.1102
CL	15	9.835	8.968 ± 1.499	2.241	0.0250*
PP	15	9.59	8.969 ± 1.465	1.64	0.101
RHB	17	9.588	8.969 ± 1.430	1.785	0.0743
BS	17	10.542	8.969 ± 1.400	4.633	<.0001***

## Sheet: TableS9_z-scores_Fly_visit
Seep Name	Species Richness*	Observed Mean	Null Mean ± s.d.	Observed z-score	p-value
PCL	n/a	n/a	n/a	n/a	n/a
PCU	n/a	n/a	n/a	n/a	n/a
CS	5	32.754	24.673 ± 9.877	1.829	0.0673
HS	5	30.094	24.684 ± 8.908	1.358	0.1744
LM	7	26.874	24.680 ± 7.639	0.76	0.4474
KC	7	25.688	24.677 ± 7.214	0.371	0.7108
RH2	9	27.514	24.691 ± 6.110	1.386	0.1657
RH1	6	29.244	24.680 ± 8.196	1.364	0.1725
RHA	7	31.008	24.683 ± 6.878	2.433	0.0150*
TPW	10	29.467	24.691 ± 5.904	2.558	0.0105*
CL	8	24.481	24.685 ± 6.582	-0.088	0.93
PP	8	26.015	24.687 ± 6.334	0.593	0.553
RHB	13	26.015	24.692 ± 5.537	0.862	0.3888
BS	11	28.105	24.692 ± 5.717	1.98	0.0477*

## Sheet: TableS10_z-scores_MPD
Seep Name	Species Richness	Observed MPD	Null MPD ± s.d.	Observed z-score	p-value
PCL	6	372.627	374.987 ± 57.690	-0.1	0.9202
PCU	7	273.857	370.727 ± 52.835	-4.851	<.0001***
CS	8	391.614	370.627 ± 47.400	1.252	0.2105
HS	11	336.618	371.232 ± 38.651	-2.97	0.0030**
LM	11	328.136	373.665 ± 39.209	-3.851	0.0001***
KC	15	365.682	374.274 ± 31.364	-1.061	0.2887
RH2	15	392.44	374.312 ± 31.182	2.252	0.0243*
RH1	16	404.173	374.167 ± 29.680	4.044	<.0001***
RHA	16	333.006	372.238 ± 30.163	-5.203	<.0001***
TPW	16	352.433	374.589 ± 30.094	-2.945	0.0032**
CL	18	318.874	372.016 ± 27.886	-8.085	<.0001***
PP	18	342.538	371.078 ± 27.975	-4.328	<.0001***
RHB	19	337.578	373.964 ± 26.542	-5.976	<.0001***
BS	20	349.505	370.217 ± 25.594	-3.619	0.0003***
